# Supplementary material for: Agarperoxinols A and B: Two Unprecedented Tricyclic 6/6/7 Rearranged Humulene-Type Sesquiterpenoids That Attenuated the Neuroinflammation in LPS-Stimulated Microglial Models
Source: PubMed Central journal article supplement — ACS Omega. 2023 Nov 9;8(46):43873–82. doi: 10.1021/acsomega.3c05783 (PMC10666226; doi:10.1021/acsomega.3c05783), 2023-11-09

## Supporting Information

### **Agarperoxinols A and B: Two Unprecedented Tricyclic 6/6/7 Rearranged Humulene-Type Sesquiterpenoids and Attenuated the Neuro-inflammatory in LPS-stimulated Microglial Models**

Chi Thanh Ma<sup>a,b</sup>, Sang Bin Lee<sup>b</sup>, In Ho Cho<sup>c</sup>, Jae Sik Yu<sup>b</sup>, Tianqi Huang<sup>d</sup>, Tae Min Lee<sup>b</sup>, Tu Loan Ly<sup>e</sup>, Sung Won Kwon<sup>c</sup>, Jeong Hill Park<sup>c</sup>, Hyun Ok Yang<sup>b,\*</sup>

*<sup>a</sup> Faculty of Pharmacy, University of Medicine and Pharmacy at Ho Chi Minh City, 41-43 Dinh Tien Hoang st., dist. 1, Ho Chi Minh city 700000, Vietnam.*

*<sup>b</sup> Department of Integrative Biological Sciences and Industry & Convergence Research Center for Natural Products, Sejong University, 209, Neungdong-ro, Gwangjin-gu, Seoul 05006, Republic of Korea.*

*<sup>c</sup> Research Institute of Pharmaceutical Sciences, College of Pharmacy, Seoul National University, 1 Gwanak-ro, Gwanak-gu, Seoul 08826, Republic of Korea.*

*<sup>d</sup> Korea Institute of Science and Technology (KIST) School, Korea University of Science and Technology (UST), 5 Hwarang-ro 14-gil, Wolgok 2(i)-dong, Seongbuk-gu, Seoul 02792, Republic of Korea.*

*<sup>e</sup> Faculty of Pharmacy, Ton Duc Thang University, Ho Chi Minh city, 19 Nguyen Huu Tho st., dist. 7, Ho Chi Minh city 700000, Vietnam.*

\*Corresponding author: Hyun Ok Yang

Department of Integrative Biological Sciences and Industry, Sejong University  
209, Neungdong-ro, Gwangjin-gu, Seoul 05006, Republic of Korea

Tel: +82-02-3408-1959

Fax: +82-02-3408-4336

E-mail: [hoyang@sejong.ac.kr](mailto:hoyang@sejong.ac.kr)

## Table of Contents

|                                  |   |
|----------------------------------|---|
| Table of Contents .....          | 2 |
| Index of Tables .....            | 3 |
| Index of Figures .....           | 4 |
| Experimental Procedures .....    | 5 |
| 1. Plant Material.....           | 5 |
| 2. Extraction and Isolation..... | 5 |
| 3. Crystallographic data .....   | 5 |

## Index of Tables

|                                                                                                                                                                                                                                             |   |
|---------------------------------------------------------------------------------------------------------------------------------------------------------------------------------------------------------------------------------------------|---|
| Table S1. Crystal data and structure refinement for 1 .....                                                                                                                                                                                 | 6 |
| Table S2. Fractional Atomic Coordinates ( $\times 10^4$ ) and Equivalent Isotropic Displacement Parameters ( $\text{\AA}^2 \times 10^3$ ) for 1. $U_{\text{eq}}$ is defined as 1/3 of the trace of the orthogonalised $U_{ij}$ tensor ..... | 7 |
| Table S3. Anisotropic Displacement Parameters ( $\text{\AA}^2 \times 10^3$ ) for 1. The Anisotropic displacement factor exponent takes the form: $-2\pi^2[h^2a^2U_{11}+2hka*b*U_{12}+\dots]$ .....                                          | 8 |
| Table S4. Bond Lengths for 1. ....                                                                                                                                                                                                          | 8 |
| Table S5. Bond Angles for 1. ....                                                                                                                                                                                                           | 9 |
| Table S6. Hydrogen Atom Coordinates ( $\text{\AA} \times 10^4$ ) and Isotropic Displacement Parameters ( $\text{\AA}^2 \times 10^3$ ) for 1. ....                                                                                           | 9 |

## Index of Figures

|                                                                                                                                         |    |
|-----------------------------------------------------------------------------------------------------------------------------------------|----|
| Figure S1. <sup>1</sup> H NMR spectrum of agarperoxinol A (1) in CDCl <sub>3</sub> (500 MHz) .....                                      | 11 |
| Figure S2. <sup>13</sup> C NMR spectrum of agarperoxinol A (1) in CDCl <sub>3</sub> (500 MHz) .....                                     | 11 |
| Figure S3. HSQC spectrum of agarperoxinol A (1) in CDCl <sub>3</sub> (500 MHz).....                                                     | 12 |
| Figure S4. HMBC spectrum of agarperoxinol A (1) in CDCl <sub>3</sub> (500 MHz).....                                                     | 12 |
| Figure S5. COSY spectrum of agarperoxinol A (1) in CDCl <sub>3</sub> (500 MHz).....                                                     | 13 |
| Figure S6. NOESY spectrum of agarperoxinol A (1) in CDCl <sub>3</sub> (500 MHz) .....                                                   | 13 |
| Figure S7. UV spectrum of agarperoxinol A (1) .....                                                                                     | 14 |
| Figure S8. Experimental ECD spectrum of agarperoxinol B (2) .....                                                                       | 14 |
| Figure S9. Optical rotation of agarperoxinol A (1).....                                                                                 | 14 |
| Figure S10. MS spectrum of agarperoxinol A (1) .....                                                                                    | 14 |
| Figure S11. <sup>1</sup> H NMR spectrum of agarperoxinol B (2) in CDCl <sub>3</sub> (800 MHz).....                                      | 15 |
| Figure S12. <sup>13</sup> C NMR spectrum of agarperoxinol B (2) in CDCl <sub>3</sub> (800 MHz).....                                     | 16 |
| Figure S13. HSQC spectrum of agarperoxinol B (2) in CDCl <sub>3</sub> (800 MHz) .....                                                   | 16 |
| Figure S14. HMBC spectrum of agarperoxinol B (2) in CDCl <sub>3</sub> (800 MHz).....                                                    | 17 |
| Figure S15. COSY spectrum of agarperoxinol B (2) in CDCl <sub>3</sub> (800 MHz) .....                                                   | 17 |
| Figure S16. NOESY spectrum of agarperoxinol B (2) in CDCl <sub>3</sub> (800 MHz).....                                                   | 18 |
| Figure S17. MS spectrum of agarperoxinol B (2).....                                                                                     | 18 |
| Figure S18. UV spectrum of agarperoxinol B (2).....                                                                                     | 19 |
| Figure S19. Experimental ECD spectrum of agarperoxinol B (2) .....                                                                      | 20 |
| Figure S20. Optical rotation of agarperoxinol B (2) .....                                                                               | 20 |
| Figure S21. The Inhibition of p-p38 and p38 phosphorylation protein expressed by agarperoxinol B on LPS-activated microglial cells..... | 20 |

## Experimental Procedures

### 1. Plant Material

The agarwood chips of *A. malaccensis* was purchased from Industrial Plantation Co. (Vientiane, Laos) in January 2010. A voucher specimen (AM-2010-01) was authenticated by Professor Jeong Hill Park (Natural Products Research Institute, Seoul National University) and deposited at the Herbarium of the Natural Product Research Institute, Seoul National University, Korea.

### 2. Extraction and Isolation

The agarwood chips of *A. malaccensis* (9.0 kg) was ground and extracted with MeOH 70% under reflux (20 L X 3h, 3 times). The extraction was evaporated under reduced pressure to obtain a crude extract (864 g), which was suspended in water and successively partitioned with diethyl ether, EtOAc, *n*-BuOH, achieving 225, 155, and 289 g of residue, respectively.

The ether fraction (30 g) was fractionated by a silica gel column (230-400 mesh, 300 g) and eluted with *n*-hexane/EtOAc (gradient, 40:1 → 1:1, v/v) to obtain 7 fractions (Et1-Et7). Fraction Et3 (3.36 g) was separated by silica gel column chromatography (230-400 mesh, 100g), eluting with *n*-hexane/EtOAc (gradient, 95:5 → 7:3, v/v) to achieve 9 sub-fractions (Et3a-Et3i). Sub-fraction Et3b (250 mg) was separated by semi-preparative RP-HPLC (MeOH-H<sub>2</sub>O, 65:35, v/v) to obtain two fractions Et3b1 and Et3b2. Compound 1 (3.44 mg) was isolated from fraction Et3b1 by semi-preparative RP-HPLC ( $t_R = 11.0$  min, CH<sub>3</sub>CN-H<sub>2</sub>O, 55:45, v/v) and fraction Et3b2 was further purified by semi-preparative RP-HPLC to yield compound 2 (8.26 mg) ( $t_R = 9.95$  min, CH<sub>3</sub>CN-H<sub>2</sub>O, 50:50, v/v).

### 3. Crystallographic data

**Table S1. Crystal data and structure refinement for 1**

|                                             |                                                               |
|---------------------------------------------|---------------------------------------------------------------|
| Empirical formula                           | C <sub>15</sub> H <sub>24</sub> O <sub>4</sub>                |
| Formula weight                              | 268.34                                                        |
| Temperature/K                               | 291(6)                                                        |
| Crystal system                              | monoclinic                                                    |
| Space group                                 | P2 <sub>1</sub> /n                                            |
| a/Å                                         | 8.9468(3)                                                     |
| b/Å                                         | 16.8211(6)                                                    |
| c/Å                                         | 10.2017(4)                                                    |
| α/°                                         | 90                                                            |
| β/°                                         | 109.839(4)                                                    |
| γ/°                                         | 90                                                            |
| Volume/Å <sup>3</sup>                       | 1444.19(9)                                                    |
| Z                                           | 4                                                             |
| ρ <sub>calc</sub> /g/cm <sup>3</sup>        | 1.234                                                         |
| μ/mm <sup>-1</sup>                          | 0.715                                                         |
| F(000)                                      | 584.0                                                         |
| Crystal size/mm <sup>3</sup>                | 0.3 × 0.1 × 0.02                                              |
| Radiation                                   | CuKα (λ = 1.54184)                                            |
| 2θ range for data collection/°              | 10.518 to 153.188                                             |
| Index ranges                                | -10 ≤ h ≤ 11, -20 ≤ k ≤ 21, -12 ≤ l ≤ 12                      |
| Reflections collected                       | 15045                                                         |
| Independent reflections                     | 2999 [R <sub>int</sub> = 0.0527, R <sub>sigma</sub> = 0.0259] |
| Data/restraints/parameters                  | 2999/0/180                                                    |
| Goodness-of-fit on F <sup>2</sup>           | 1.056                                                         |
| Final R indexes [I ≥ 2σ (I)]                | R <sub>1</sub> = 0.0447, wR <sub>2</sub> = 0.1297             |
| Final R indexes [all data]                  | R <sub>1</sub> = 0.0540, wR <sub>2</sub> = 0.1393             |
| Largest diff. peak/hole / e Å <sup>-3</sup> | 0.18/-0.14                                                    |

**Table S2. Fractional Atomic Coordinates ( $\times 10^4$ ) and Equivalent Isotropic Displacement Parameters ( $\text{\AA}^2 \times 10^3$ ) for 1.  $U_{\text{eq}}$  is defined as 1/3 of the trace of the orthogonalised  $U_{\text{ij}}$  tensor**

| Atom | <i>x</i>    | <i>y</i>   | <i>z</i>   | $U(\text{eq})$ |
|------|-------------|------------|------------|----------------|
| O1   | 10439.5(13) | 5570.2(9)  | 3144.1(13) | 74.8(4)        |
| O2   | 8137.5(11)  | 4723.5(7)  | 3940.3(10) | 53.3(3)        |
| O3   | 4276.7(13)  | 5247.2(8)  | 3323.6(13) | 65.7(3)        |
| O4   | 3222.5(16)  | 5850.5(9)  | 2447.7(17) | 81.0(4)        |
| C1   | 4884.0(18)  | 3017.1(11) | 1475.2(18) | 63.3(4)        |
| C2   | 6489.8(19)  | 3179.7(11) | 1376.2(18) | 62.1(4)        |
| C3   | 7598.1(16)  | 3621.9(10) | 2275.3(16) | 55.9(4)        |
| C4   | 9128.2(19)  | 3833.3(13) | 2053(2)    | 69.1(5)        |
| C5   | 9032(2)     | 4634.3(13) | 1333.9(18) | 71.4(5)        |
| C6   | 8903.2(18)  | 5370.0(12) | 2160.7(17) | 64.5(4)        |
| C7   | 7662.0(17)  | 5344.4(10) | 2899.2(15) | 55.5(4)        |
| C8   | 5979.2(17)  | 5193.6(10) | 1857.6(15) | 55.4(4)        |
| C9   | 4853.8(15)  | 4761.4(9)  | 2447.5(15) | 52.2(3)        |
| C10  | 5602.9(15)  | 4042.3(9)  | 3380.9(14) | 48.9(3)        |
| C11  | 4746.5(16)  | 3239.5(10) | 2880.0(17) | 55.9(4)        |
| C12  | 7355.1(15)  | 3971.2(9)  | 3541.6(14) | 49.6(3)        |
| C13  | 7684(2)     | 6103.9(12) | 3702(2)    | 75.8(5)        |
| C14  | 2991.7(19)  | 3293.4(13) | 2743(2)    | 73.7(5)        |
| C15  | 5510(2)     | 2592.8(12) | 3961(2)    | 73.8(5)        |

**Table S3. Anisotropic Displacement Parameters ( $\text{\AA}^2 \times 10^3$ ) for 1. The Anisotropic displacement factor exponent takes the form:  $-2\pi^2[h^2a^{*2}U_{11}+2hka^*b^*U_{12}+\dots]$ .**

| Atom | $U_{11}$ | $U_{22}$  | $U_{33}$ | $U_{23}$ | $U_{13}$ | $U_{12}$ |
|------|----------|-----------|----------|----------|----------|----------|
| O1   | 52.2(6)  | 103.9(10) | 57.0(6)  | 16.1(6)  | 3.8(5)   | -21.7(6) |
| O2   | 43.3(5)  | 68.3(6)   | 37.7(5)  | 4.2(4)   | -0.1(4)  | -8.5(4)  |
| O3   | 57.3(6)  | 74.7(7)   | 61.8(7)  | -0.9(5)  | 15.7(5)  | 16.3(5)  |
| O4   | 67.9(7)  | 75.5(8)   | 101(1)   | 19.6(7)  | 30.8(7)  | 21.8(6)  |
| C1   | 48.1(7)  | 69.3(10)  | 64.5(9)  | -14.3(8) | 8.5(6)   | -4.7(7)  |
| C2   | 54.1(8)  | 70(1)     | 60.6(8)  | -10.8(7) | 17.2(7)  | 2.7(7)   |
| C3   | 41.8(6)  | 66.1(9)   | 56.6(8)  | 0.4(7)   | 12.4(6)  | 5.9(6)   |
| C4   | 45.7(7)  | 93.3(12)  | 69.7(10) | -6.1(9)  | 21.6(7)  | 1.7(8)   |
| C5   | 51.2(8)  | 111.8(15) | 51.3(8)  | 2.3(9)   | 17.7(7)  | -10.1(8) |
| C6   | 50.0(8)  | 87.1(12)  | 47.4(8)  | 13.7(7)  | 4.6(6)   | -11.4(7) |
| C7   | 50.5(7)  | 64.9(9)   | 42.8(7)  | 5.6(6)   | 5.1(6)   | -6.5(6)  |
| C8   | 47.5(7)  | 65.1(9)   | 44.0(7)  | 5.1(6)   | 3.1(6)   | 3.7(6)   |
| C9   | 41.8(6)  | 61.9(8)   | 44.8(7)  | -2.9(6)  | 4.1(5)   | 4.5(6)   |
| C10  | 39.5(6)  | 60.4(8)   | 42.1(6)  | -0.1(6)  | 7.6(5)   | 1.4(5)   |
| C11  | 39.9(6)  | 63.1(9)   | 59.2(8)  | -1.7(7)  | 9.7(6)   | -2.5(6)  |
| C12  | 37.3(6)  | 59.8(8)   | 43.9(6)  | 4.6(6)   | 3.5(5)   | -1.1(5)  |
| C13  | 78.7(11) | 69.0(11)  | 70.4(10) | -6.6(9)  | 13.4(9)  | -13.5(9) |
| C14  | 45.0(8)  | 90.3(12)  | 83.3(12) | -7.3(10) | 18.4(8)  | -9.0(8)  |
| C15  | 63.5(9)  | 69.3(11)  | 82.5(12) | 12.5(9)  | 16.7(8)  | -4.3(8)  |

**Table S4. Bond Lengths for 1.**

| Atom | Atom | Length/ $\text{\AA}$ | Atom | Atom | Length/ $\text{\AA}$ |
|------|------|----------------------|------|------|----------------------|
| O1   | C6   | 1.4398(17)           | C5   | C6   | 1.524(3)             |
| O2   | C7   | 1.4468(18)           | C6   | C7   | 1.540(2)             |
| O2   | C12  | 1.4365(18)           | C7   | C8   | 1.5409(19)           |
| O3   | O4   | 1.4649(17)           | C7   | C13  | 1.514(3)             |
| O3   | C9   | 1.4305(19)           | C8   | C9   | 1.522(2)             |
| C1   | C2   | 1.499(2)             | C9   | C10  | 1.545(2)             |
| C1   | C11  | 1.526(2)             | C10  | C11  | 1.551(2)             |
| C2   | C3   | 1.327(2)             | C10  | C12  | 1.5246(17)           |
| C3   | C4   | 1.504(2)             | C11  | C14  | 1.531(2)             |
| C3   | C12  | 1.501(2)             | C11  | C15  | 1.534(2)             |
| C4   | C5   | 1.523(3)             |      |      |                      |



**Table S5. Bond Angles for 1.**

| Atom | Atom | Atom | Angle/°    | Atom | Atom | Atom | Angle/°    |
|------|------|------|------------|------|------|------|------------|
| C12  | O2   | C7   | 115.75(10) | C13  | C7   | C8   | 110.01(14) |
| C9   | O3   | O4   | 107.99(12) | C9   | C8   | C7   | 115.39(12) |
| C2   | C1   | C11  | 113.77(13) | O3   | C9   | C8   | 113.69(13) |
| C3   | C2   | C1   | 124.34(15) | O3   | C9   | C10  | 103.61(12) |
| C2   | C3   | C4   | 122.23(16) | C8   | C9   | C10  | 114.27(11) |
| C2   | C3   | C12  | 121.47(14) | C9   | C10  | C11  | 114.60(11) |
| C12  | C3   | C4   | 116.25(14) | C12  | C10  | C9   | 110.05(12) |
| C3   | C4   | C5   | 112.10(14) | C12  | C10  | C11  | 110.01(12) |
| C4   | C5   | C6   | 117.03(15) | C1   | C11  | C10  | 109.54(13) |
| O1   | C6   | C5   | 110.01(15) | C1   | C11  | C14  | 109.62(13) |
| O1   | C6   | C7   | 110.00(13) | C1   | C11  | C15  | 110.06(15) |
| C5   | C6   | C7   | 116.78(14) | C14  | C11  | C10  | 110.80(13) |
| O2   | C7   | C6   | 107.35(13) | C14  | C11  | C15  | 107.47(15) |
| O2   | C7   | C8   | 111.25(12) | C15  | C11  | C10  | 109.32(12) |
| O2   | C7   | C13  | 105.40(13) | O2   | C12  | C3   | 112.93(12) |
| C6   | C7   | C8   | 111.43(12) | O2   | C12  | C10  | 110.23(12) |
| C13  | C7   | C6   | 111.22(14) | C3   | C12  | C10  | 112.47(11) |

**Table S6. Hydrogen Atom Coordinates ( $\text{\AA}\times 10^4$ ) and Isotropic Displacement Parameters ( $\text{\AA}^2\times 10^3$ ) for 1.**

| Atom | x        | y        | z        | U(eq)   |
|------|----------|----------|----------|---------|
| H1   | 10603    | 5309     | 3857     | 112     |
| H4   | 2200(40) | 5740(20) | 2610(40) | 139(11) |
| H1A  | 4647     | 2456     | 1307     | 76      |
| H1B  | 4093     | 3312     | 748      | 76      |
| H2   | 6725     | 2956     | 635      | 75      |
| H4A  | 9382     | 3425     | 1491     | 83      |
| H4B  | 9979     | 3848     | 2947     | 83      |
| H5A  | 8118     | 4625     | 483      | 86      |
| H5B  | 9969     | 4691     | 1067     | 86      |
| H6   | 8597     | 5810     | 1492     | 77      |
| H8A  | 5509     | 5701     | 1489     | 66      |
| H8B  | 6071     | 4886     | 1085     | 66      |
| H9   | 3941     | 4573     | 1667     | 63      |
| H10  | 5548     | 4150     | 4308     | 59      |
| H12  | 7836     | 3602     | 4314     | 60      |
| H13A | 6889     | 6076     | 4138     | 114     |
| H13B | 7466     | 6548     | 3074     | 114     |
| H13C | 8711     | 6170     | 4402     | 114     |

|      |      |      |      |     |
|------|------|------|------|-----|
| H14A | 2908 | 3427 | 3630 | 111 |
| H14B | 2486 | 2791 | 2437 | 111 |
| H14C | 2481 | 3697 | 2075 | 111 |
| H15A | 6553 | 2474 | 3944 | 111 |
| H15B | 4867 | 2122 | 3742 | 111 |
| H15C | 5587 | 2778 | 4871 | 111 |

Figure S1.  $^1\text{H}$  NMR spectrum of agarperoxinol A (1) in  $\text{CDCl}_3$  (500 MHz)

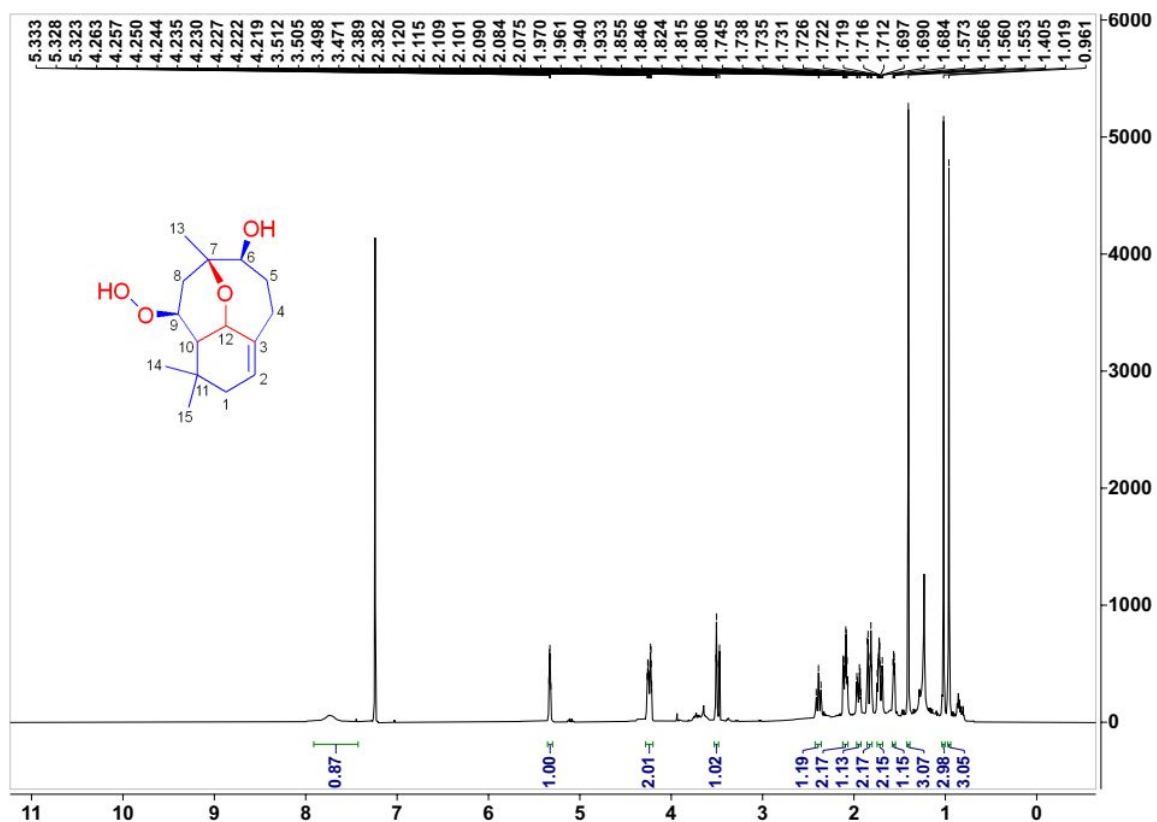

Figure S2.  $^{13}\text{C}$  NMR spectrum of agarperoxinol A (1) in  $\text{CDCl}_3$  (500 MHz)

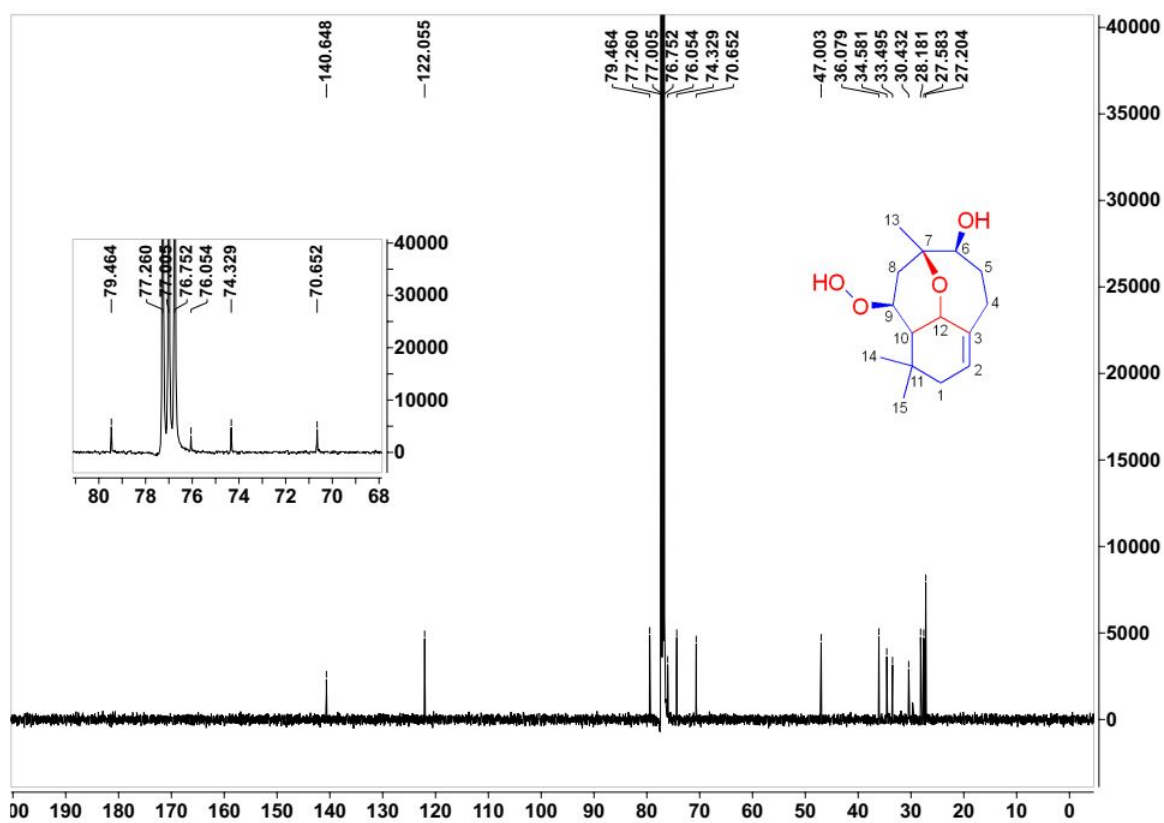

Figure S3. HSQC spectrum of agarperoxinol A (1) in CDCl<sub>3</sub> (500 MHz)

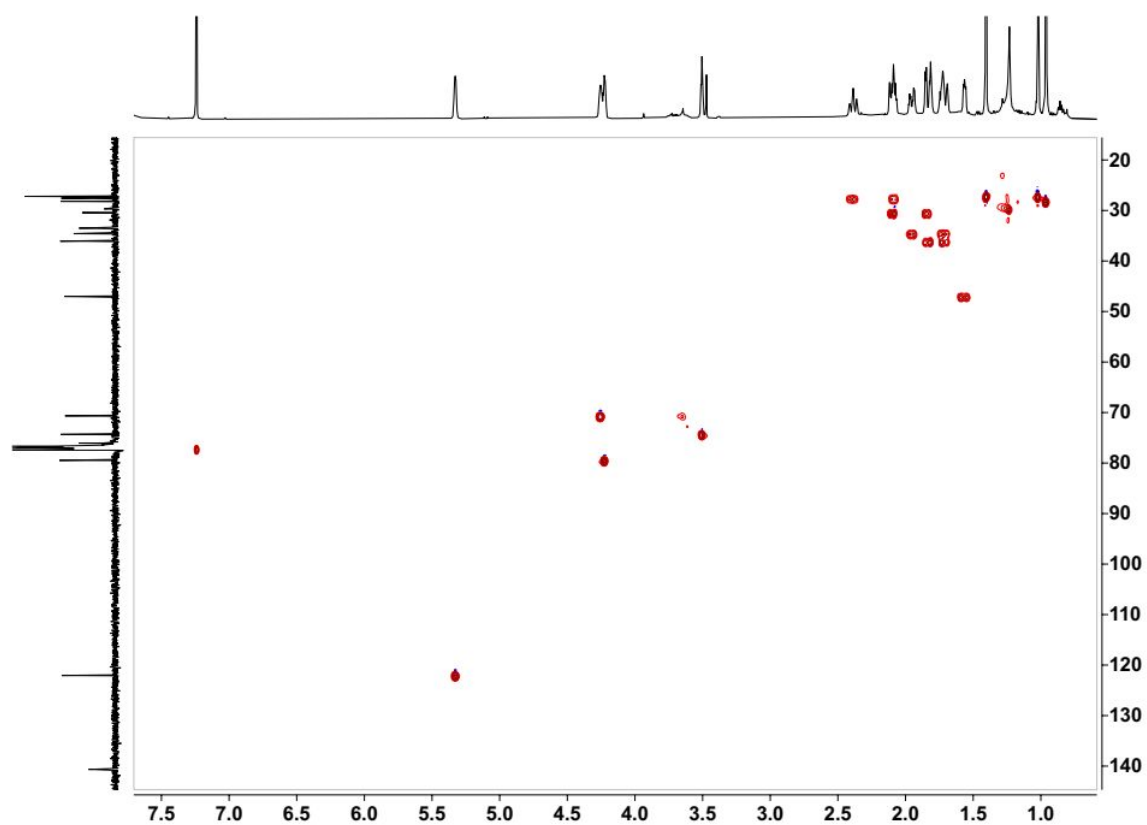

Figure S4. HMBC spectrum of agarperoxinol A (1) in CDCl<sub>3</sub> (500 MHz)

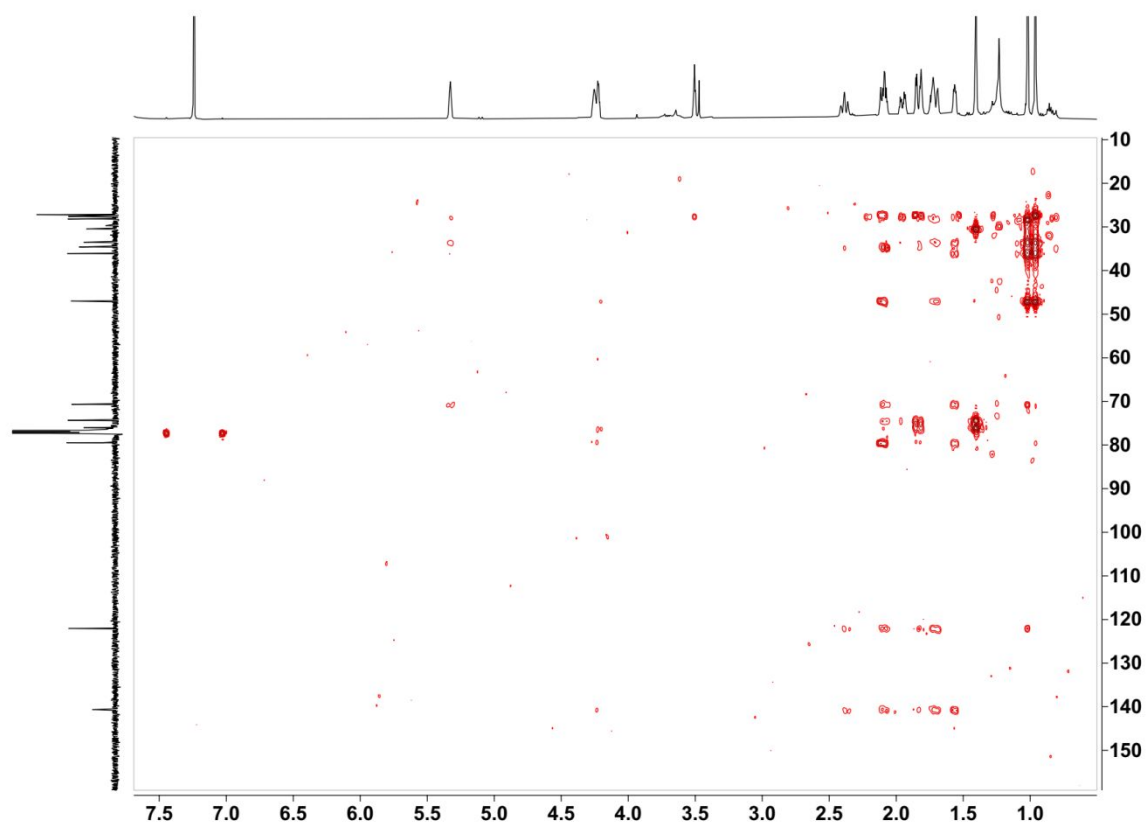

Figure S5. COSY spectrum of agarperoxinol A (1) in CDCl<sub>3</sub> (500 MHz)

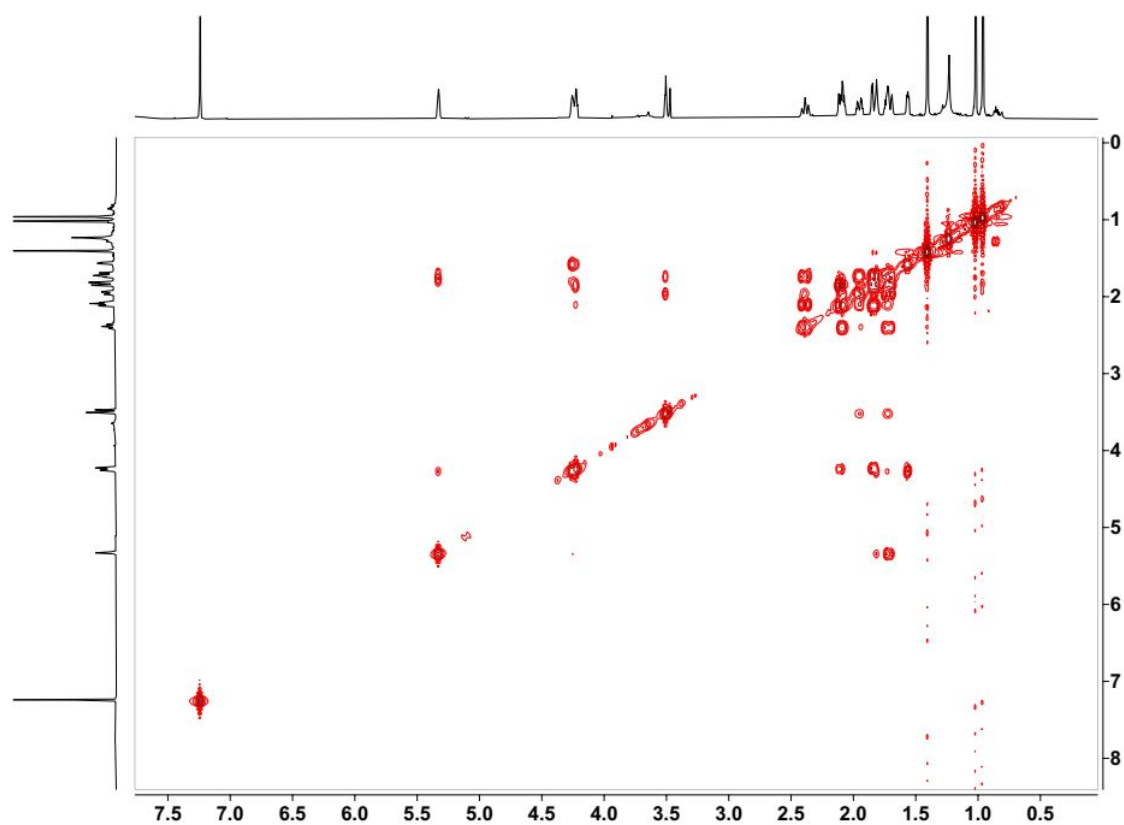

Figure S6. NOESY spectrum of agarperoxinol A (1) in CDCl<sub>3</sub> (500 MHz)

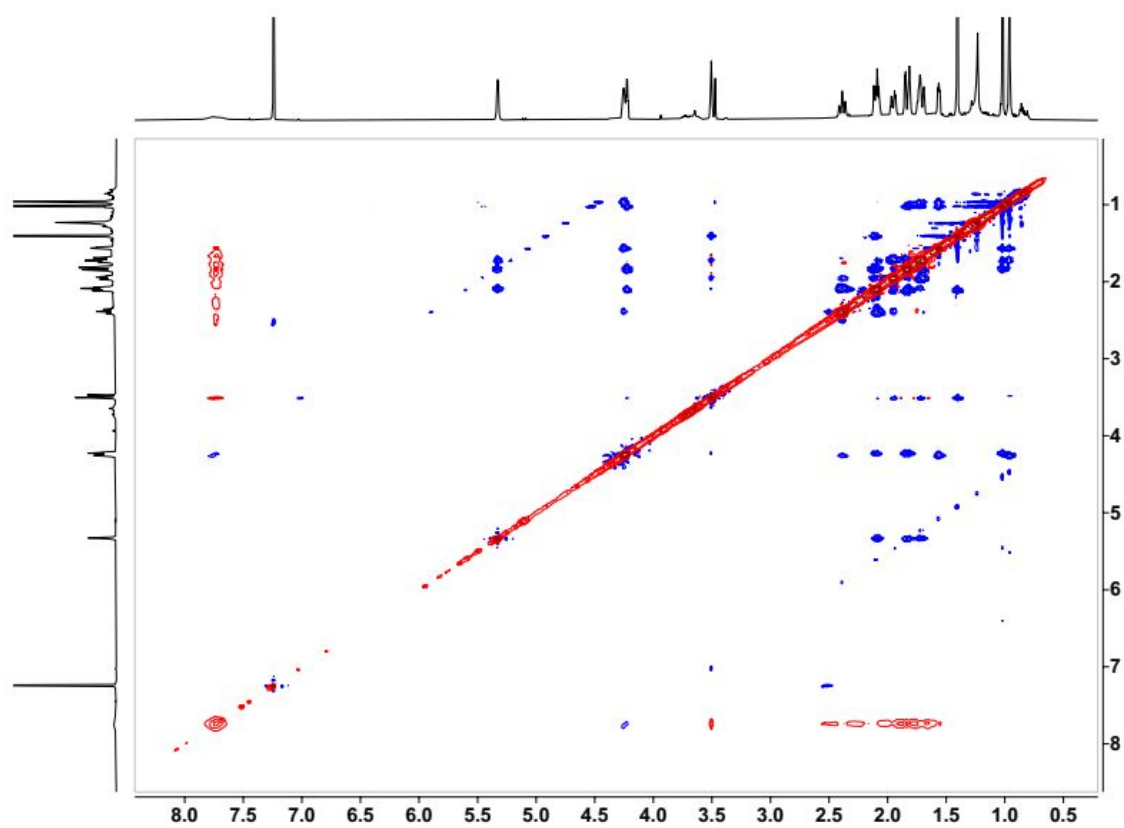

**Figure S7. UV spectrum of agarperoxinol A (1)**

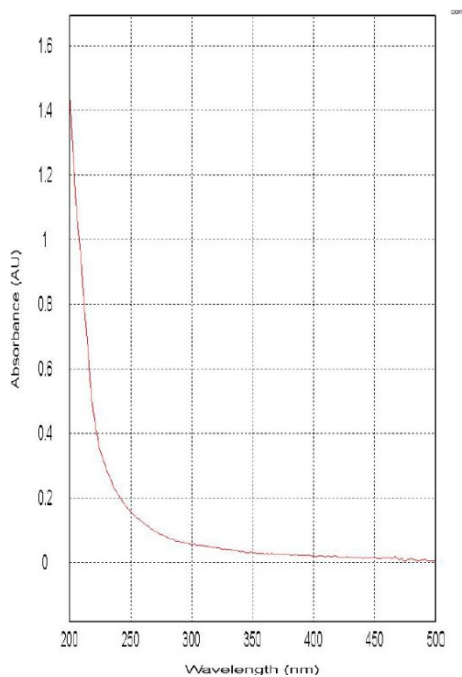

**Figure S8. Experimental ECD spectrum of agarperoxinol B (2)**

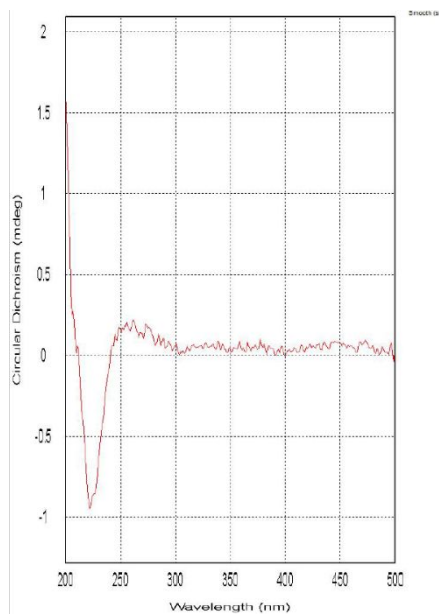

**Figure S9. Optical rotation of agarperoxinol A (1)**

| No. | Sample Name    | Optical Rotation Monitor | Specific O.R. | Path Length[mm] | Concentration[w/v%] | Water content[%] | S.D.   | C.V.    | Comment |
|-----|----------------|--------------------------|---------------|-----------------|---------------------|------------------|--------|---------|---------|
| 1   | compound 40    | -0.0041                  | -28.0690      | 10              | 0.1450              | 0                | 3.3480 | 11.9276 |         |
| 2   | compound 40-1  | -0.0039                  | -26.8966      |                 |                     |                  |        |         |         |
| 3   | compound 40-2  | -0.0046                  | -31.7241      |                 |                     |                  |        |         |         |
| 4   | compound 40-3  | -0.0037                  | -25.5172      |                 |                     |                  |        |         |         |
| 5   | compound 40-4  | -0.0048                  | -33.1034      |                 |                     |                  |        |         |         |
| 6   | compound 40-5  | -0.0038                  | -26.2069      |                 |                     |                  |        |         |         |
| 7   | compound 40-6  | -0.0031                  | -21.3793      |                 |                     |                  |        |         |         |
| 8   | compound 40-7  | -0.0042                  | -28.9655      |                 |                     |                  |        |         |         |
| 9   | compound 40-8  | -0.0040                  | -27.5862      |                 |                     |                  |        |         |         |
| 10  | compound 40-9  | -0.0043                  | -29.6552      |                 |                     |                  |        |         |         |
| 11  | compound 40-10 | -0.0043                  | -29.6552      |                 |                     |                  |        |         |         |

**Figure S10. MS spectrum of agarperoxinol A (1)**

## Qualitative Compound Report

|                               |                |                      |                       |
|-------------------------------|----------------|----------------------|-----------------------|
| <b>Data File</b>              | Compound40.d   | <b>Sample Name</b>   | Compound40            |
| <b>Sample Type</b>            | Sample         | <b>Position</b>      | P1-A7                 |
| <b>Instrument Name</b>        | Instrument 1   | <b>User Name</b>     |                       |
| <b>Acq Method</b>             | DIP method-0.m | <b>Acquired Time</b> | 4/20/2017 12:55:23 PM |
| <b>IRM Calibration Status</b> | Success        | <b>DA Method</b>     | Default.m             |
| <b>Comment</b>                |                |                      |                       |
| <b>Sample Group</b>           |                | <b>Info.</b>         |                       |
| <b>Stream Name</b>            | LC 1           |                      |                       |

### Compound Table

| Compound Label  | RT    | Mass     | Abund | Formula  | Tgt Mass | Diff (ppm) |
|-----------------|-------|----------|-------|----------|----------|------------|
| Cpd 1: C15H24O4 | 0.177 | 268.1673 | 16175 | C15H24O4 | 268.1675 | -0.73      |

| Compound Label  | RT    | Algorithm       | Mass     |
|-----------------|-------|-----------------|----------|
| Cpd 1: C15H24O4 | 0.177 | Find By Formula | 268.1673 |

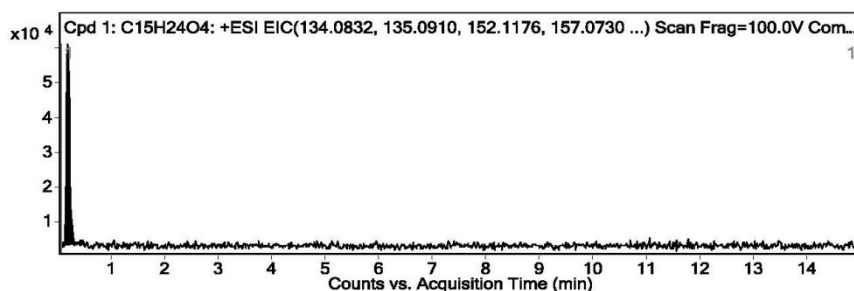

### MS Spectrum

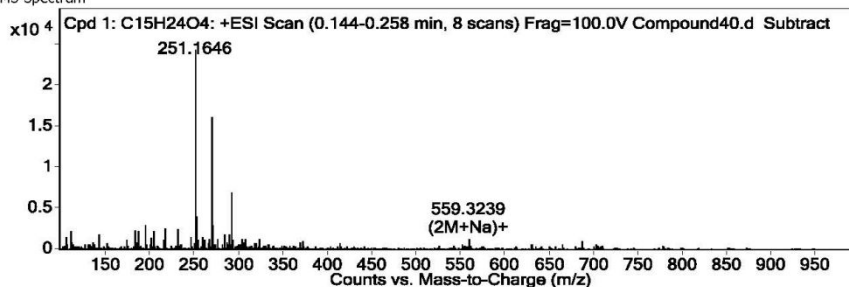

## Qualitative Compound Report

### MS Zoomed Spectrum

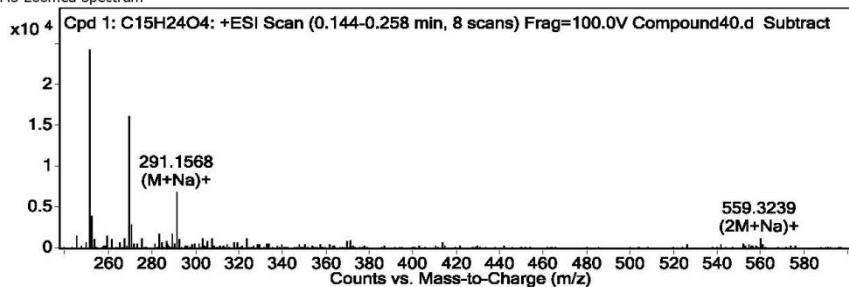

### MS Spectrum Peak List

| m/z      | Calc m/z | Diff(ppm) | z | Abund | Formula       | Ion                   |
|----------|----------|-----------|---|-------|---------------|-----------------------|
| 251.1646 |          |           |   | 24294 |               |                       |
| 268.1619 | 268.1669 | -18.77    | 1 | 118   | C15 H24 O4    | M <sup>+</sup>        |
| 269.1745 | 269.1747 | -0.85     | 1 | 16175 | C15 H25 O4    | (M+H) <sup>+</sup>    |
| 286.2005 | 286.2013 | -2.78     | 1 | 947   | C15 H28 N O4  | (M+NH4) <sup>+</sup>  |
| 291.1568 | 291.1567 | 0.52      | 1 | 6963  | C15 H24 Na O4 | (M+Na) <sup>+</sup>   |
| 307.1347 | 307.1306 | 13.29     | 1 | 1280  | C15 H24 K O4  | (M+K) <sup>+</sup>    |
| 537.3259 | 537.3422 | -30.37    | 1 | 204   | C30 H49 O8    | (2M+H) <sup>+</sup>   |
| 554.3707 | 554.3687 | 3.49      | 1 | 51    | C30 H52 N O8  | (2M+NH4) <sup>+</sup> |
| 559.3239 | 559.3241 | -0.42     | 1 | 1332  | C30 H48 Na O8 | (2M+Na) <sup>+</sup>  |
| 575.3091 | 575.2981 | 19.1      | 1 | 202   | C30 H48 K O8  | (2M+K) <sup>+</sup>   |

--- End Of Report ---

Figure S11. <sup>1</sup>H NMR spectrum of agarperoxinol B (2) in CDCl<sub>3</sub> (800 MHz)

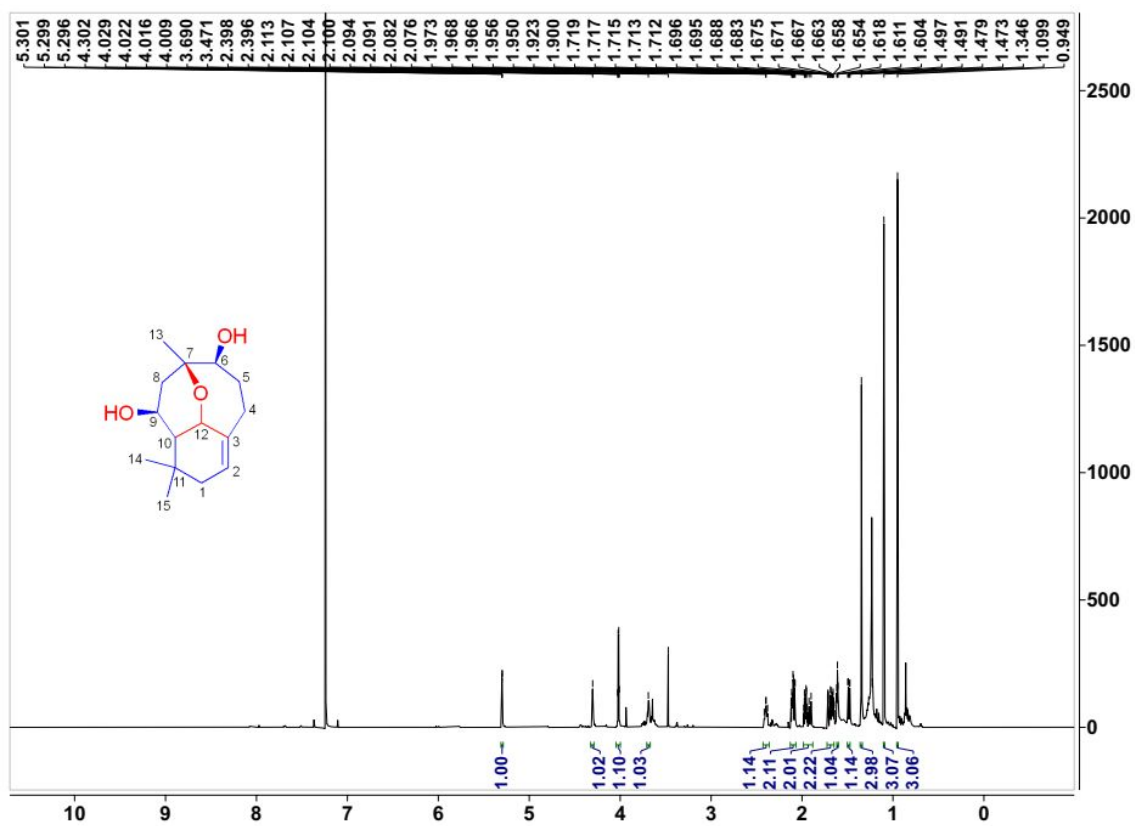

Figure S12.  $^{13}\text{C}$  NMR spectrum of agarperoxinol B (2) in  $\text{CDCl}_3$  (800 MHz)

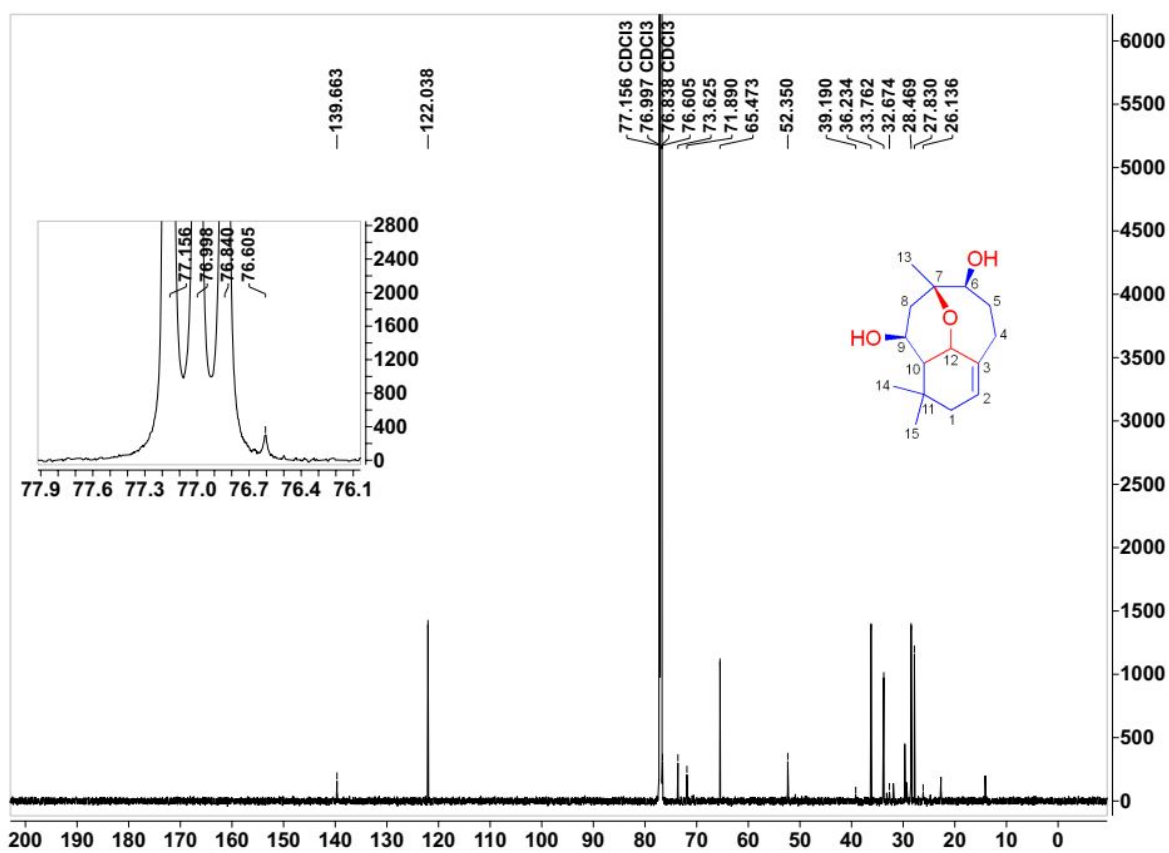

Figure S13. HSQC spectrum of agarperoxinol B (2) in  $\text{CDCl}_3$  (800 MHz)



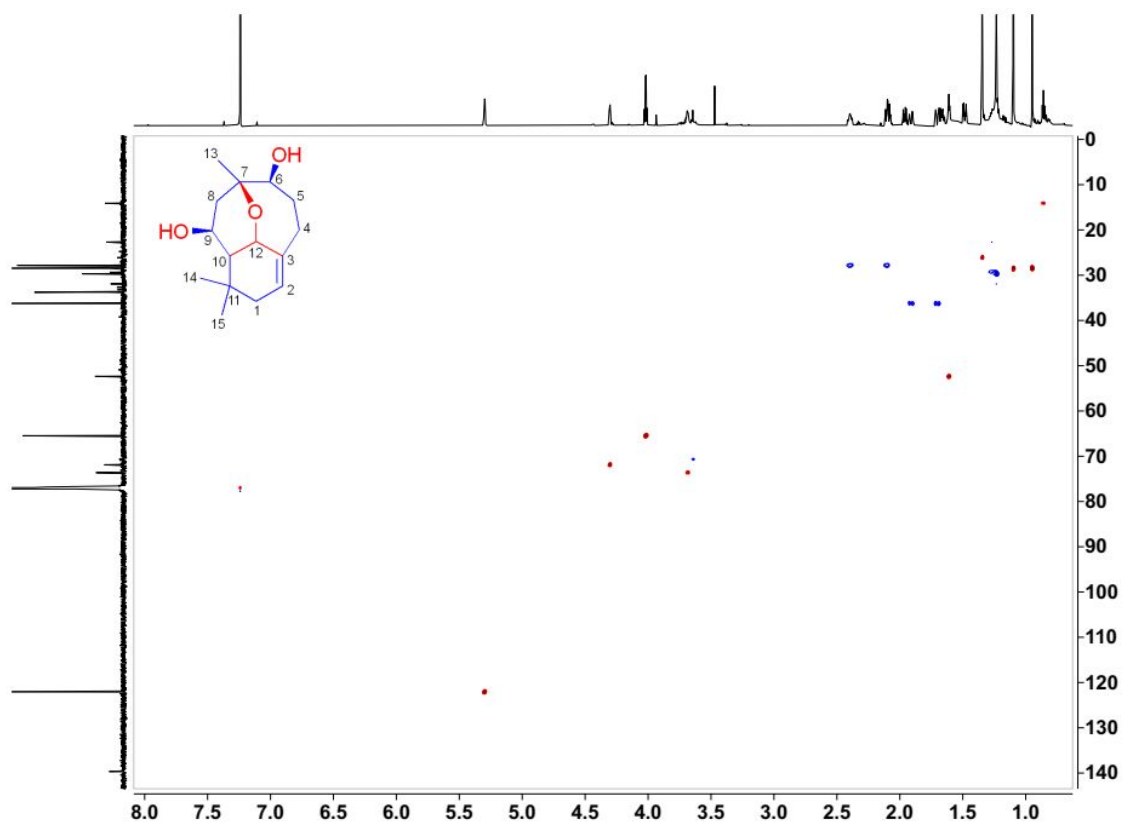

Figure S14. HMBC spectrum of agarperoxinol B (2) in CDCl<sub>3</sub> (800 MHz)

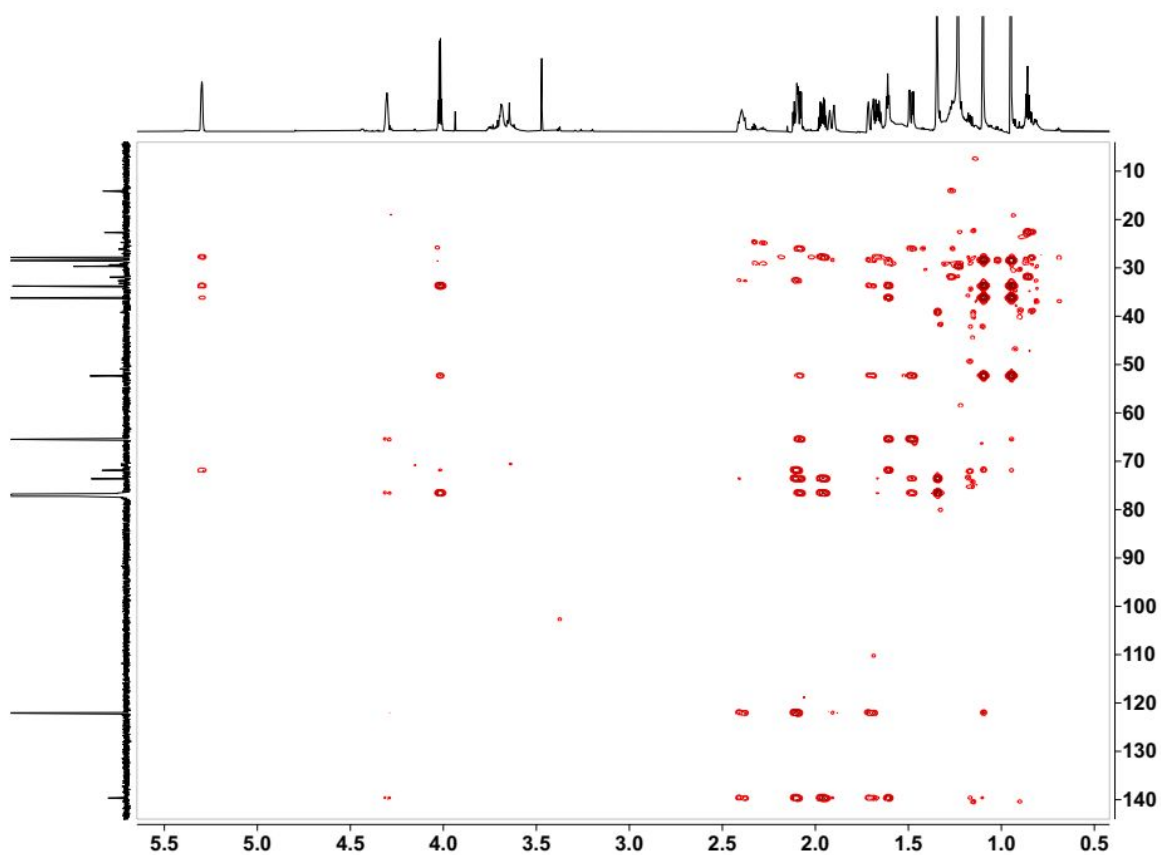

Figure S15. COSY spectrum of agarperoxinol B (2) in CDCl<sub>3</sub> (800 MHz)

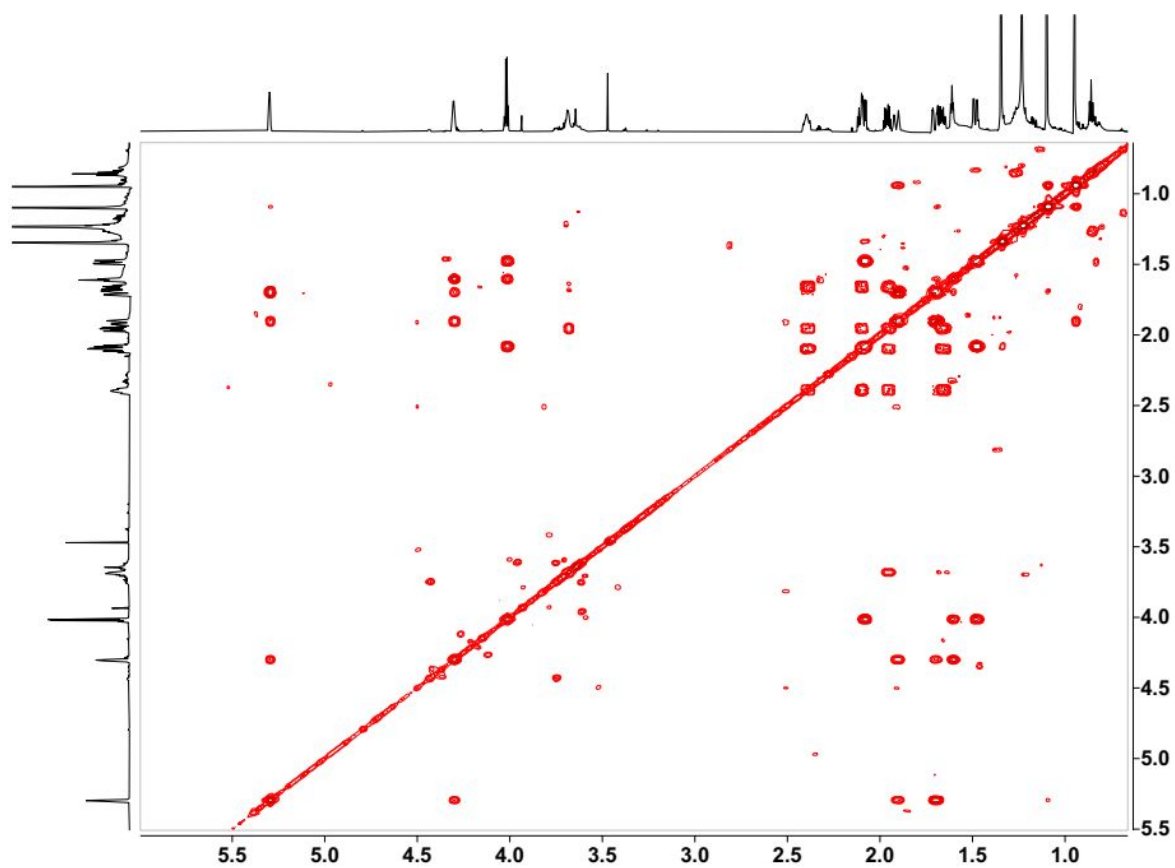

Figure S16. NOESY spectrum of agarperoxinol B (2) in  $\text{CDCl}_3$  (800 MHz)

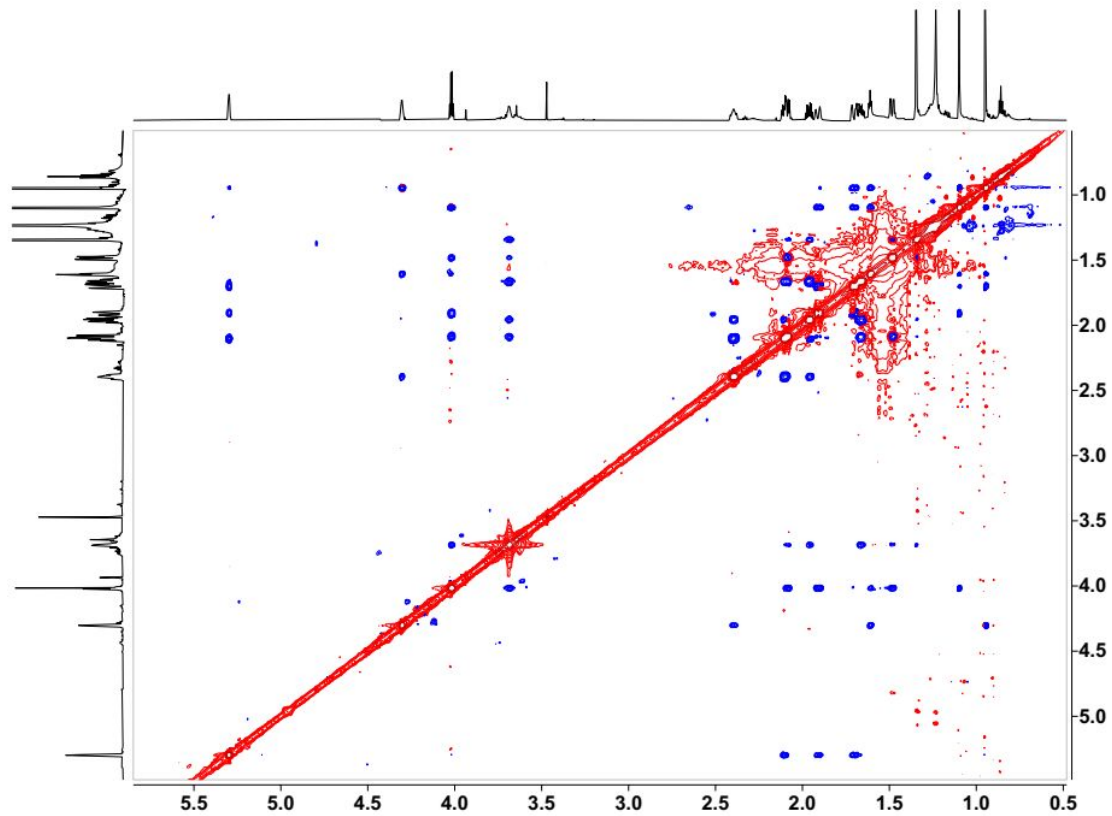

Figure S17. MS spectrum of agarperoxinol B (2)

## Qualitative Compound Report

|                               |                |                      |                      |
|-------------------------------|----------------|----------------------|----------------------|
| <b>Data File</b>              | Compound47.d   | <b>Sample Name</b>   | Compound47           |
| <b>Sample Type</b>            | Sample         | <b>Position</b>      | P1-B4                |
| <b>Instrument Name</b>        | Instrument 1   | <b>User Name</b>     |                      |
| <b>Acq Method</b>             | DIP method-0.m | <b>Acquired Time</b> | 4/20/2017 2:29:41 PM |
| <b>IRM Calibration Status</b> | Success        | <b>DA Method</b>     | Default.m            |
| <b>Comment</b>                |                |                      |                      |
| <b>Sample Group</b>           | Info.          |                      |                      |
| <b>Stream Name</b>            | LC 1           |                      |                      |

### Compound Table

| Compound Label  | RT   | Mass     | Abund | Formula  | Tgt Mass | Diff (ppm) |
|-----------------|------|----------|-------|----------|----------|------------|
| Cpd 1: C15H24O3 | 0.18 | 252.1735 | 12909 | C15H24O3 | 252.1725 | 3.68       |

| Compound Label  | RT   | Algorithm       | Mass     |
|-----------------|------|-----------------|----------|
| Cpd 1: C15H24O3 | 0.18 | Find By Formula | 252.1735 |

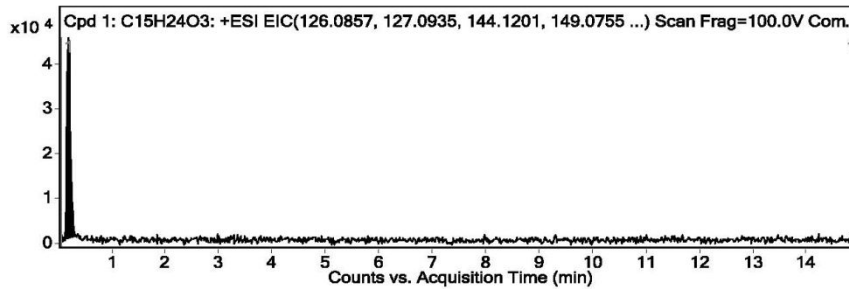

### MS Spectrum

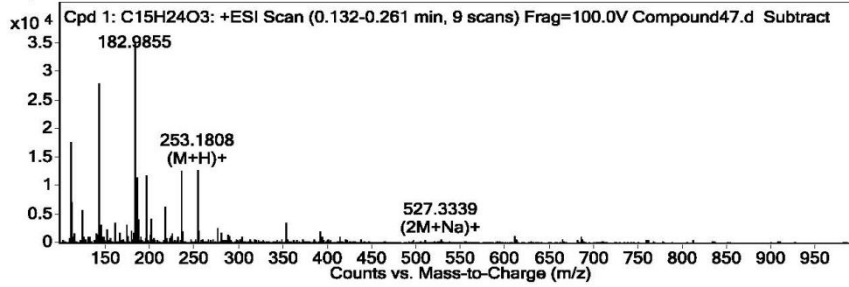

## Qualitative Compound Report

### MS Zoomed Spectrum

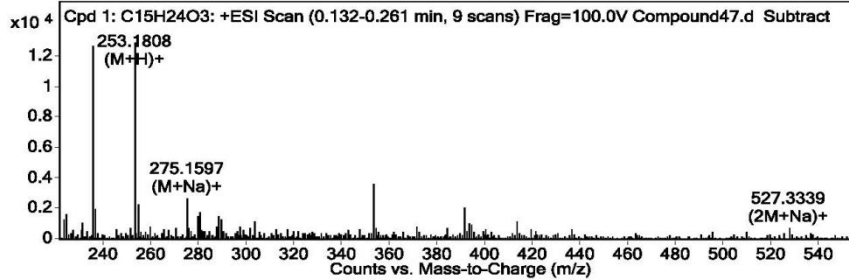

### MS Spectrum Peak List

| m/z      | Calc m/z | Diff(ppm) | z | Abund | Formula       | Ion                   |
|----------|----------|-----------|---|-------|---------------|-----------------------|
| 182.9855 |          |           |   | 34867 |               |                       |
| 184.9862 |          |           |   | 11442 |               |                       |
| 252.1733 | 252.172  | 5.28      | 1 | 292   | C15 H24 O3    | M <sup>+</sup>        |
| 253.1808 | 253.1798 | 3.8       | 1 | 12909 | C15 H25 O3    | (M+H) <sup>+</sup>    |
| 270.2055 | 270.2064 | -3.17     | 1 | 778   | C15 H28 N O3  | (M+NH4) <sup>+</sup>  |
| 275.1597 | 275.1618 | -7.64     | 1 | 2727  | C15 H24 Na O3 | (M+Na) <sup>+</sup>   |
| 291.1356 | 291.1357 | -0.23     | 1 | 411   | C15 H24 K O3  | (M+K) <sup>+</sup>    |
| 504.3426 | 504.3445 | -3.94     | 1 | 158   | C30 H48 O6    | 2M <sup>+</sup>       |
| 522.3749 | 522.3789 | -7.63     | 1 | 89    | C30 H52 N O6  | (2M+NH4) <sup>+</sup> |
| 527.3339 | 527.3343 | -0.74     | 1 | 774   | C30 H48 Na O6 | (2M+Na) <sup>+</sup>  |

--- End Of Report ---

**Figure S18. UV spectrum of agarperoxinol B (2)**

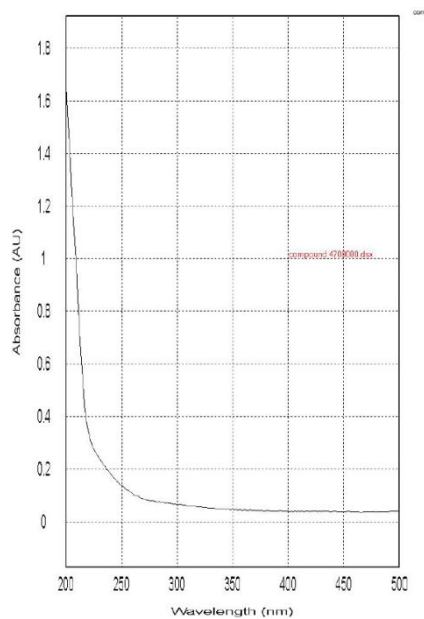

**Figure S19. Experimental ECD spectrum of agarperoxinol B (2)**

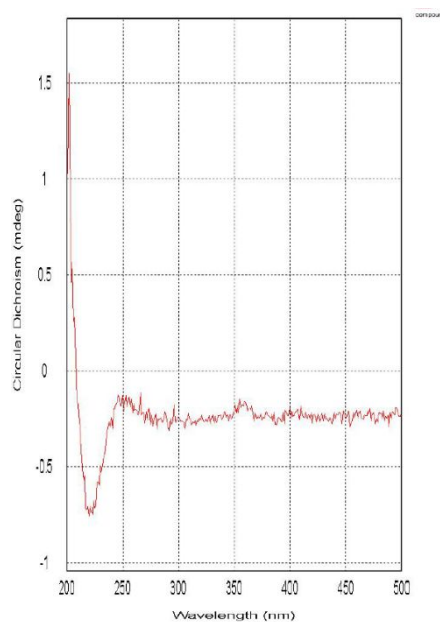

**Figure S20. Optical rotation of agarperoxinol B (2)**

| No. | Sample Name    | Optical Rotation Monitor | Specific O.R. | Path Length[mm] | Concentration[w/v%] | Water content[%] | S.D.    | C.V.    | Comment |
|-----|----------------|--------------------------|---------------|-----------------|---------------------|------------------|---------|---------|---------|
| 1   | compound 47    | 0.0129                   | 108.2744      | 10              | 0.1200              | 1.1              | 10.8725 | 10.0416 |         |
| 2   | compound 47-1  | 0.0138                   | 116.2791      |                 |                     |                  |         |         |         |
| 3   | compound 47-2  | 0.0129                   | 108.6957      |                 |                     |                  |         |         |         |
| 4   | compound 47-3  | 0.0106                   | 89.3158       |                 |                     |                  |         |         |         |
| 5   | compound 47-4  | 0.0132                   | 111.2235      |                 |                     |                  |         |         |         |
| 6   | compound 47-5  | 0.0137                   | 115.4365      |                 |                     |                  |         |         |         |
| 7   | compound 47-6  | 0.0140                   | 117.9643      |                 |                     |                  |         |         |         |
| 8   | compound 47-7  | 0.0131                   | 110.3809      |                 |                     |                  |         |         |         |
| 9   | compound 47-8  | 0.0104                   | 87.6306       |                 |                     |                  |         |         |         |
| 10  | compound 47-9  | 0.0137                   | 115.4365      |                 |                     |                  |         |         |         |
| 11  | compound 47-10 | 0.0131                   | 110.3809      |                 |                     |                  |         |         |         |

**Figure S21. The Inhibition of p-p38 and p38 phosphorylation protein expressed by agarperoxinol B on LPS-activated microglial cells.**

Protein levels were determined by using Western blot analysis. The relative intensity of p-p38/p38 bands were calculated by densitometry. Values are mean±SEM (n=5); \*\*\*p<0.001 compared to control group.

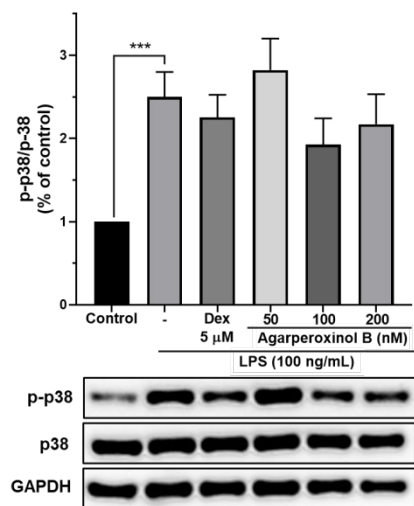

Supplement: ao3c05783_si_001.pdf [file ao3c05783_si_001.pdf]
